# Supplementary material
Source: HighWire-hosted journal article supplement (http://cmaj.ca/highwire/filestream/58568/field_highwire_adjunct_files/0/acute-hilton-f.pdf)
Supplement: acute-hilton-f.pdf [file acute-hilton-f.pdf]

PREMIER ARTICLE

## Définir l'insuffisance rénale aiguë

Rachel Hilton MA PhD

La prise en charge initiale d'épisodes d'insuffisance rénale aiguë est souvent assurée par des cliniciens qui ne sont pas des spécialistes en néphrologie. Leurs efforts peuvent être entravés par plusieurs facteurs, tels que notre manque de compréhension de l'insuffisance rénale aiguë, ainsi que le consensus et les anecdotes qui constituent la base d'une grande partie de notre pratique plutôt que des données probantes de haute qualité. Cette situation est en partie engendrée par l'absence d'une définition uniforme de l'insuffisance rénale aiguë. Le présent article vise à mettre en évidence les récentes tentatives qui ont été effectuées pour élaborer une définition normalisée de l'insuffisance rénale aiguë à des fins de diagnostic et de classification, et à expliquer la façon dont ces tentatives peuvent aider les cliniciens dans leur pratique quotidienne.

### La définition traditionnelle

L'insuffisance rénale aiguë est traditionnellement définie comme étant une chute rapide du débit de filtration glomérulaire (DFG), qui se manifeste cliniquement par une augmentation brutale et soutenue des taux sériques d'urée et de créatinine, accompagnée d'une perturbation associée à l'homéostasie du sel et de l'eau<sup>1</sup>.

Cette définition comporte plusieurs limitations importantes qui ont des répercussions dans la pratique clinique. Les termes « rapide », « brutal » et « soutenu » ne sont pas définis. L'insuffisance rénale aiguë peut évoluer en quelques heures ou en quelques jours, selon la cause. La rapidité de l'apparition peut être en corrélation avec la gravité de l'épisode, mais cette corrélation n'est pas implicite dans la définition.

Il n'existe pas de définition biochimique précise de l'insuffisance rénale aiguë. Différentes études utilisent différentes définitions quantitatives : certaines s'appuient sur l'augmentation absolue ou en pourcentage des taux de créatinine, tandis que d'autres, sur la nécessité de dialyse<sup>2</sup>. L'utilisation de différentes définitions a entraîné de grandes différences dans les rapports d'incidence et dans les résultats, des comparaisons d'études confondantes et des évaluations minées à l'égard des stratégies préventives.

La concentration sérique de l'urée fournit une mauvaise estimation du débit de filtration glomérulaire, car elle peut être modifiée par des facteurs tels que l'apport en protéines, une maladie grave, une hémorragie gastro-intestinale ou la pharmacothérapie<sup>3</sup>. Se fier aux modifications dans la concentration d'urée pour comprendre qu'il y a altération du débit de filtration glomérulaire peut donc conduire à des retards éventuels dans la détection d'une insuffisance rénale aiguë.

Le taux de production de créatinine dépend de la masse musculaire. Par conséquent, la vitesse à laquelle la concentration de créatinine augmente en cas d'insuffisance rénale aiguë dépend de la masse musculaire et du débit de filtration glomérulaire. Les définitions qui s'appuient sur les variations absolues des taux de créatinine font abstraction des effets majeurs de modification liés à l'âge, au sexe et à l'origine ethnique sur la masse musculaire et la génération de créatinine<sup>4</sup>. En outre, le taux sérique de créatinine ne reflète pas exactement le débit de filtration glomérulaire, à moins que le patient soit dans un état stable. Les variations du taux de créatinine sont généralement en retard sur les variations du débit de filtration glomérulaire, ce qui explique pourquoi les calculs des taux sériques de créatinine pour estimer la filtration glomérulaire ne sont pas fiables, à moins que le taux de créatinine soit stable pendant plusieurs jours. Aussi, parce que la créatinine est retirée par la dialyse, il n'est pas possible d'évaluer la fonction rénale en utilisant les taux sériques de créatinine une fois la dialyse amorcée.

**Affiliation :** Rachel Hilton travaille pour le Guy's and St. Thomas' National Health Service Foundation Trust, Renal Unit, Guy's Hospital, Great Maze Pond, Londres, Royaume-Uni

**Intérêts concurrents :**  
Aucun déclaré.

Cet article a été revu par les pairs.

**Correspondance à :**  
Dre Rachel Hilton,  
rachel.hilton@gstt.nhs.uk

**CMAJ 2011. DOI:10,1503/cmaj.081170**

### POINTS IMPORTANTS

- Les définitions traditionnelles de l'insuffisance rénale aiguë manquent de précision, ce qui mène à de la confusion et à un manque de consensus.
- Des définitions progressives de l'insuffisance rénale aiguë ont été proposées pour permettre la normalisation des études cliniques et épidémiologiques.
- L'expression « lésion rénale aiguë » englobe le spectre entier de la dysfonction rénale aiguë, de légère à grave.
- L'utilisation de ces nouvelles définitions permettra de déceler et de traiter précocement cette maladie potentiellement dévastatrice.

## La classification RIFLE

En 2000, des experts en soins intensifs et des néphrologues se sont réunis pour former l'ADQI (Acute Dialysis Quality Initiative) afin d'élaborer des directives à l'égard du traitement et de la prévention de l'insuffisance rénale aiguë. Le processus de consensus s'est appuyé sur des données probantes publiées lorsqu'elles étaient accessibles et, en l'absence de données, sur l'opinion des experts faisant consensus. À partir de ces travaux, une définition consensuelle, la classification RIFLE (Risk [risque], Injury [lésion], Failure [insuffisance], Loss [perte] et End-stage kidney disease [maladie rénale en phase terminale]), a été élaborée<sup>5</sup>.

La classification RIFLE (figure 1)<sup>5</sup> comprend trois stades de lésion (risque, lésion et insuffisance) et deux résultats (perte et maladie rénale en phase terminale). L'évaluation du stade de lésion se fonde sur la présence de l'un des paramètres suivants : une augmentation du taux sérique de créatinine, une diminution du débit de filtration glomérulaire ou une variation dans le volume de production d'urine. Le schéma a été largement validé<sup>6</sup> et a démontré qu'il permettait de prédire des résultats.

L'utilisation des critères de classification RIFLE pour définir l'insuffisance rénale aiguë présente plusieurs faiblesses. L'affectation des variations correspondant au taux sérique de créatinine et au volume de production d'urine au même taux de classification RIFLE est arbitraire, car le taux sérique de créatinine prédit la mortalité avec plus de précision que le volume de production d'urine<sup>7</sup>. Il est donc important que les paramètres résultant du taux de classification RIFLE le moins favorable soient appliqués. Une variation rapide du taux sérique de créatinine est également problématique, car elle n'est pas directement en corrélation avec une variation réelle du débit de filtration glomérulaire. En outre, de nombreux patients peuvent présenter une dysfonction rénale aiguë sans

que l'on dispose de mesure de référence de la fonction rénale. Cela pose problème dans un système de classification qui prend en considération les variations à partir des valeurs de base comme paramètre de diagnostic.

## Lésions rénales aiguës

En 2005, le réseau AKIN (Acute Kidney Injury Network), composé du groupe ADQI et d'autres membres<sup>8</sup>, a proposé des modifications aux critères de classification RIFLE. Comme auparavant, le processus reposait sur l'examen des données publiées et sur l'opinion des experts faisant consensus. L'on a proposé que l'expression « lésion rénale aiguë » englobe le spectre entier de la dysfonction rénale aiguë, depuis les variations mineures dans la fonction rénale jusqu'à la dépendance à la dialyse.

Selon la définition proposée, une lésion rénale aiguë est une réduction brutale (en 48 heures) de la fonction rénale se traduisant par au moins l'un des résultats suivants : (i) une élévation absolue du taux sérique de créatinine de plus de 26,4 µmol/L (0,3 mg/dL); (ii) une augmentation du pourcentage du taux sérique de créatinine de plus de 50 % (soit une augmentation de 1,5 fois la valeur de base); ou (iii) une réduction du volume de production d'urine (oligurie < 0,5 mL/kg/h pour > 6 heures). Le réseau AKIN a également proposé un système de classification des lésions rénales aiguës (figure 2)<sup>8</sup> qui visait à définir le degré de dysfonction rénale au moment du diagnostic et à faciliter le suivi de l'évolution clinique.

À l'instar des critères de classification RIFLE, l'inclusion d'un pourcentage de variation du taux sérique de créatinine prend en compte les variations liées à l'âge, au sexe et à l'origine ethnique et réduit la nécessité d'une mesure de référence du taux de créatinine. Cependant, au moins deux mesures du taux de créatinine dans les 48 heures sont nécessaires. Le

|                                   | Variation de la concentration sérique de créatinine                                             | Variation du DFG  | Volume d'urine                                        |
|-----------------------------------|-------------------------------------------------------------------------------------------------|-------------------|-------------------------------------------------------|
| Risque de dysfonction rénale      | Augmentation > 50 %                                                                             | Diminution > 25 % | < 0,5 mL/kg/h pendant > 6 h                           |
| Lésion au rein                    | Augmentation double                                                                             | Diminution > 50 % | < 0,5 mL/kg/h pendant > 12 h                          |
| Défaillance de la fonction rénale | Augmentation triple ou ≥ 350 µmol/L avec une élévation aiguë de ≥ 44 µmol/L                     | Diminution > 75 % | < 0,5 mL/kg/h pendant > 24 h ou anurie pendant > 12 h |
| Perte de la fonction rénale       | Perte de la fonction rénale, qui rend une dialyse nécessaire, d'une durée de plus de 4 semaines |                   |                                                       |
| Maladie rénale au stade terminal  | Perte de la fonction rénale, qui rend une dialyse nécessaire, d'une durée de plus de 3 mois     |                   |                                                       |

Figure 1 : La classification RIFLE pour l'insuffisance rénale aiguë<sup>5</sup>. Le stade de la lésion ou le résultat est déterminé soit par le taux sérique de créatinine, soit par le débit de filtration glomérulaire (DFG), selon la mesure qui indique le stade le plus grave de l'insuffisance rénale.

|         | Variation de la concentration sérique de créatinine                                                                                                    | Volume d'urine                                                                      |
|---------|--------------------------------------------------------------------------------------------------------------------------------------------------------|-------------------------------------------------------------------------------------|
| Stade 1 | Augmentation de $\geq 26,4 \mu\text{mol/L}$ ou 150 % à 200 % par rapport aux valeurs initiales                                                         | $< 0,5 \text{ mL/kg/h}$ pendant $> 6 \text{ h}$                                     |
| Stade 2 | Augmentation de $> 200 \%$ à 300 % par rapport aux valeurs initiales                                                                                   | $< 0,5 \text{ mL/kg/h}$ pendant $> 12 \text{ h}$                                    |
| Stage 3 | Augmentation de $> 300 \%$ par rapport aux valeurs initiales ou de $\geq 354 \mu\text{mol/L}$ avec une augmentation aiguë de $\geq 44 \mu\text{mol/L}$ | $< 0,3 \text{ mL/kg/h}$ pendant $> 24 \text{ h}$ ou anurie pendant $> 12 \text{ h}$ |

Figure 2 : Le schéma de classification d'une lésion rénale aiguë<sup>8</sup>. Le stade de la lésion est déterminé soit par le taux sérique de créatinine, soit par le volume de production d'urine, selon la mesure qui indique le stade le plus grave de la lésion rénale.

volume de production d'urine demeure l'un des critères à considérer, mais avec l'hypothèse que l'obstruction des voies urinaires a été exclue et que l'état du volume d'urine du patient a été optimisé.

On peut voir que les catégories RIFLE de risque, de lésion et d'insuffisance correspondent aux stades 1, 2 et 3 du système AKIN. Les catégories de classification RIFLE relatives à la perte et à la maladie rénale en phase terminale ont été retirées du système de classification, mais elles demeurent des résultats de lésions rénales.

## Implications pour les cliniciens

Ces nouvelles définitions sont essentielles aux études épidémiologiques et cliniques afin que nous puissions enfin comparer « des pommes avec des pommes »<sup>9</sup>. Leur utilité au chevet d'un malade est moins évidente dans l'immédiat, car aucune définition ne fournit d'indication sur la cause physiopathologique de l'élévation des taux de créatinine ou de l'oligurie. Cependant, ces nouvelles définitions constituent toujours une première étape importante dans l'élaboration d'une définition uniforme des lésions rénales aiguës.

Premièrement, nous devons garder à l'esprit que la définition traditionnelle de l'insuffisance rénale aiguë était vague; nous avons maintenant une définition claire du terme « brutal », et nous disposons de paramètres clairs quant aux variations dans les taux sériques de créatinine et quant au volume de production d'urine. Deuxièmement, le changement du terme « défaillance » pour le terme « lésion » nous rappelle que les dommages aux reins sont le plus souvent dus à des agressions extrinsèques telles que la septicémie, l'hypotension et l'utilisation de médicaments néphrotoxiques, et que beaucoup de ces dommages sont évitables ou réversibles.

La terminologie révisée souligne l'existence de lésions rénales aiguës le long d'un continuum et le fait que, sans égard à la cause, les lésions les plus graves sont susceptibles de présenter des résultats plus défavorables. Non seulement l'application de ces définitions contribuera au dépistage précoce des patients atteints de lésions rénales aiguës, mais

encore elle incitera les cliniciens à surveiller et à ajuster l'équilibre des liquides chez leurs patients, à donner des antibiotiques lorsque c'est indiqué et à arrêter les médicaments qui peuvent avoir des effets néphrotoxiques.

Grâce aux nouvelles définitions, les études démontrent maintenant que des variations, même modestes, de la fonction rénale indiquées par des variations relativement faibles dans le taux sérique de créatinine sont associées à des conséquences cliniques négatives importantes, telles qu'une mortalité hospitalière accrue, un taux de rétablissement rénal diminué, un risque accru de la nécessité de recourir à un traitement de substitution et une augmentation de la durée du séjour à l'hôpital<sup>10</sup>. Étant donné que l'insuffisance rénale aiguë demeure une maladie dévastatrice affichant un taux élevé de mortalité malgré des progrès dans les soins d'entretien, il est important de reconnaître, de prévenir ou de traiter même les formes les plus bénignes de lésions rénales aiguës.

## Références

1. Lameire NH, Vanholder RC. « Acute renal failure: pathophysiology and prevention » Dans: Davison AM, Cameron JS, Grunfeld JP et coll., dir. *Oxford textbook of clinical nephrology*. 3<sup>e</sup> éd. Oxford (RU): Oxford University Press; 2005. p 1445-64.
2. Bagshaw SM, Gibney RT. « Conventional markers of kidney function » *Crit Care Med* 2008;36(Suppl):S152-8.
3. Mehta RL, Chertow GM. Acute renal failure definitions and classification: time for change? » *J Am Soc Nephrol* 2003;14:2178-87.
4. Stevens LA, Coresh J, Greene T, et coll. « Assessing kidney function — measured and estimated glomerular filtration rate » *N Engl J Med* 2006;354:2473-83.
5. Bellomo R, Ronco C, Kellum JA, et coll. « Acute Dialysis Quality Initiative workgroup. Acute renal failure — definition, outcome measures, animal models, fluid therapy and information technology needs: the Second International Consensus Conference of the Acute Dialysis Quality Initiative (ADQI) Group » *Crit Care* 2004;8:R204-12.
6. Ricci Z, Cruz D, Ronco C. « The RIFLE criteria and mortality in acute kidney injury: a systematic review » *Kidney Int* 2008;73:538-46.
7. Cruz DN, Bolgan I, Perazella MA, et coll.; North East Italian Prospective Hospital Renal Outcome Survey on Acute Kidney Injury. (NEIPHROS-AKI) Investigators. « North east Italian prospective hospital renal outcome survey on acute kidney injury (NEIPHROS-AKI): targeting the problem with the RIFLE criteria » *Clin J Am Soc Nephrol* 2007;2:418-25.
8. Mehta RL, Kellum JA, Shah SV, et coll. « Acute Kidney Injury Network. Acute Kidney Injury Network: report of an initiative to improve outcomes in acute kidney injury » *Crit Care* 2007;11:R31.
9. Ricci Z, Cruz D, Ronco C. « The RIFLE classification for acute kidney injury definition » *Am J Surg* 2009;198:152-3.
10. Ali T, Khan I, Simpson W, et coll. « Incidence and outcomes in acute kidney injury: a comprehensive population-based study » *J Am Soc Nephrol* 2007;18:1292-8.
